# Supplementary material
Source: publisher site journal article supplement (https://www.dovepress.com/article/323657)

2 (1H, CDCl<sub>3</sub>, 500 MHz)

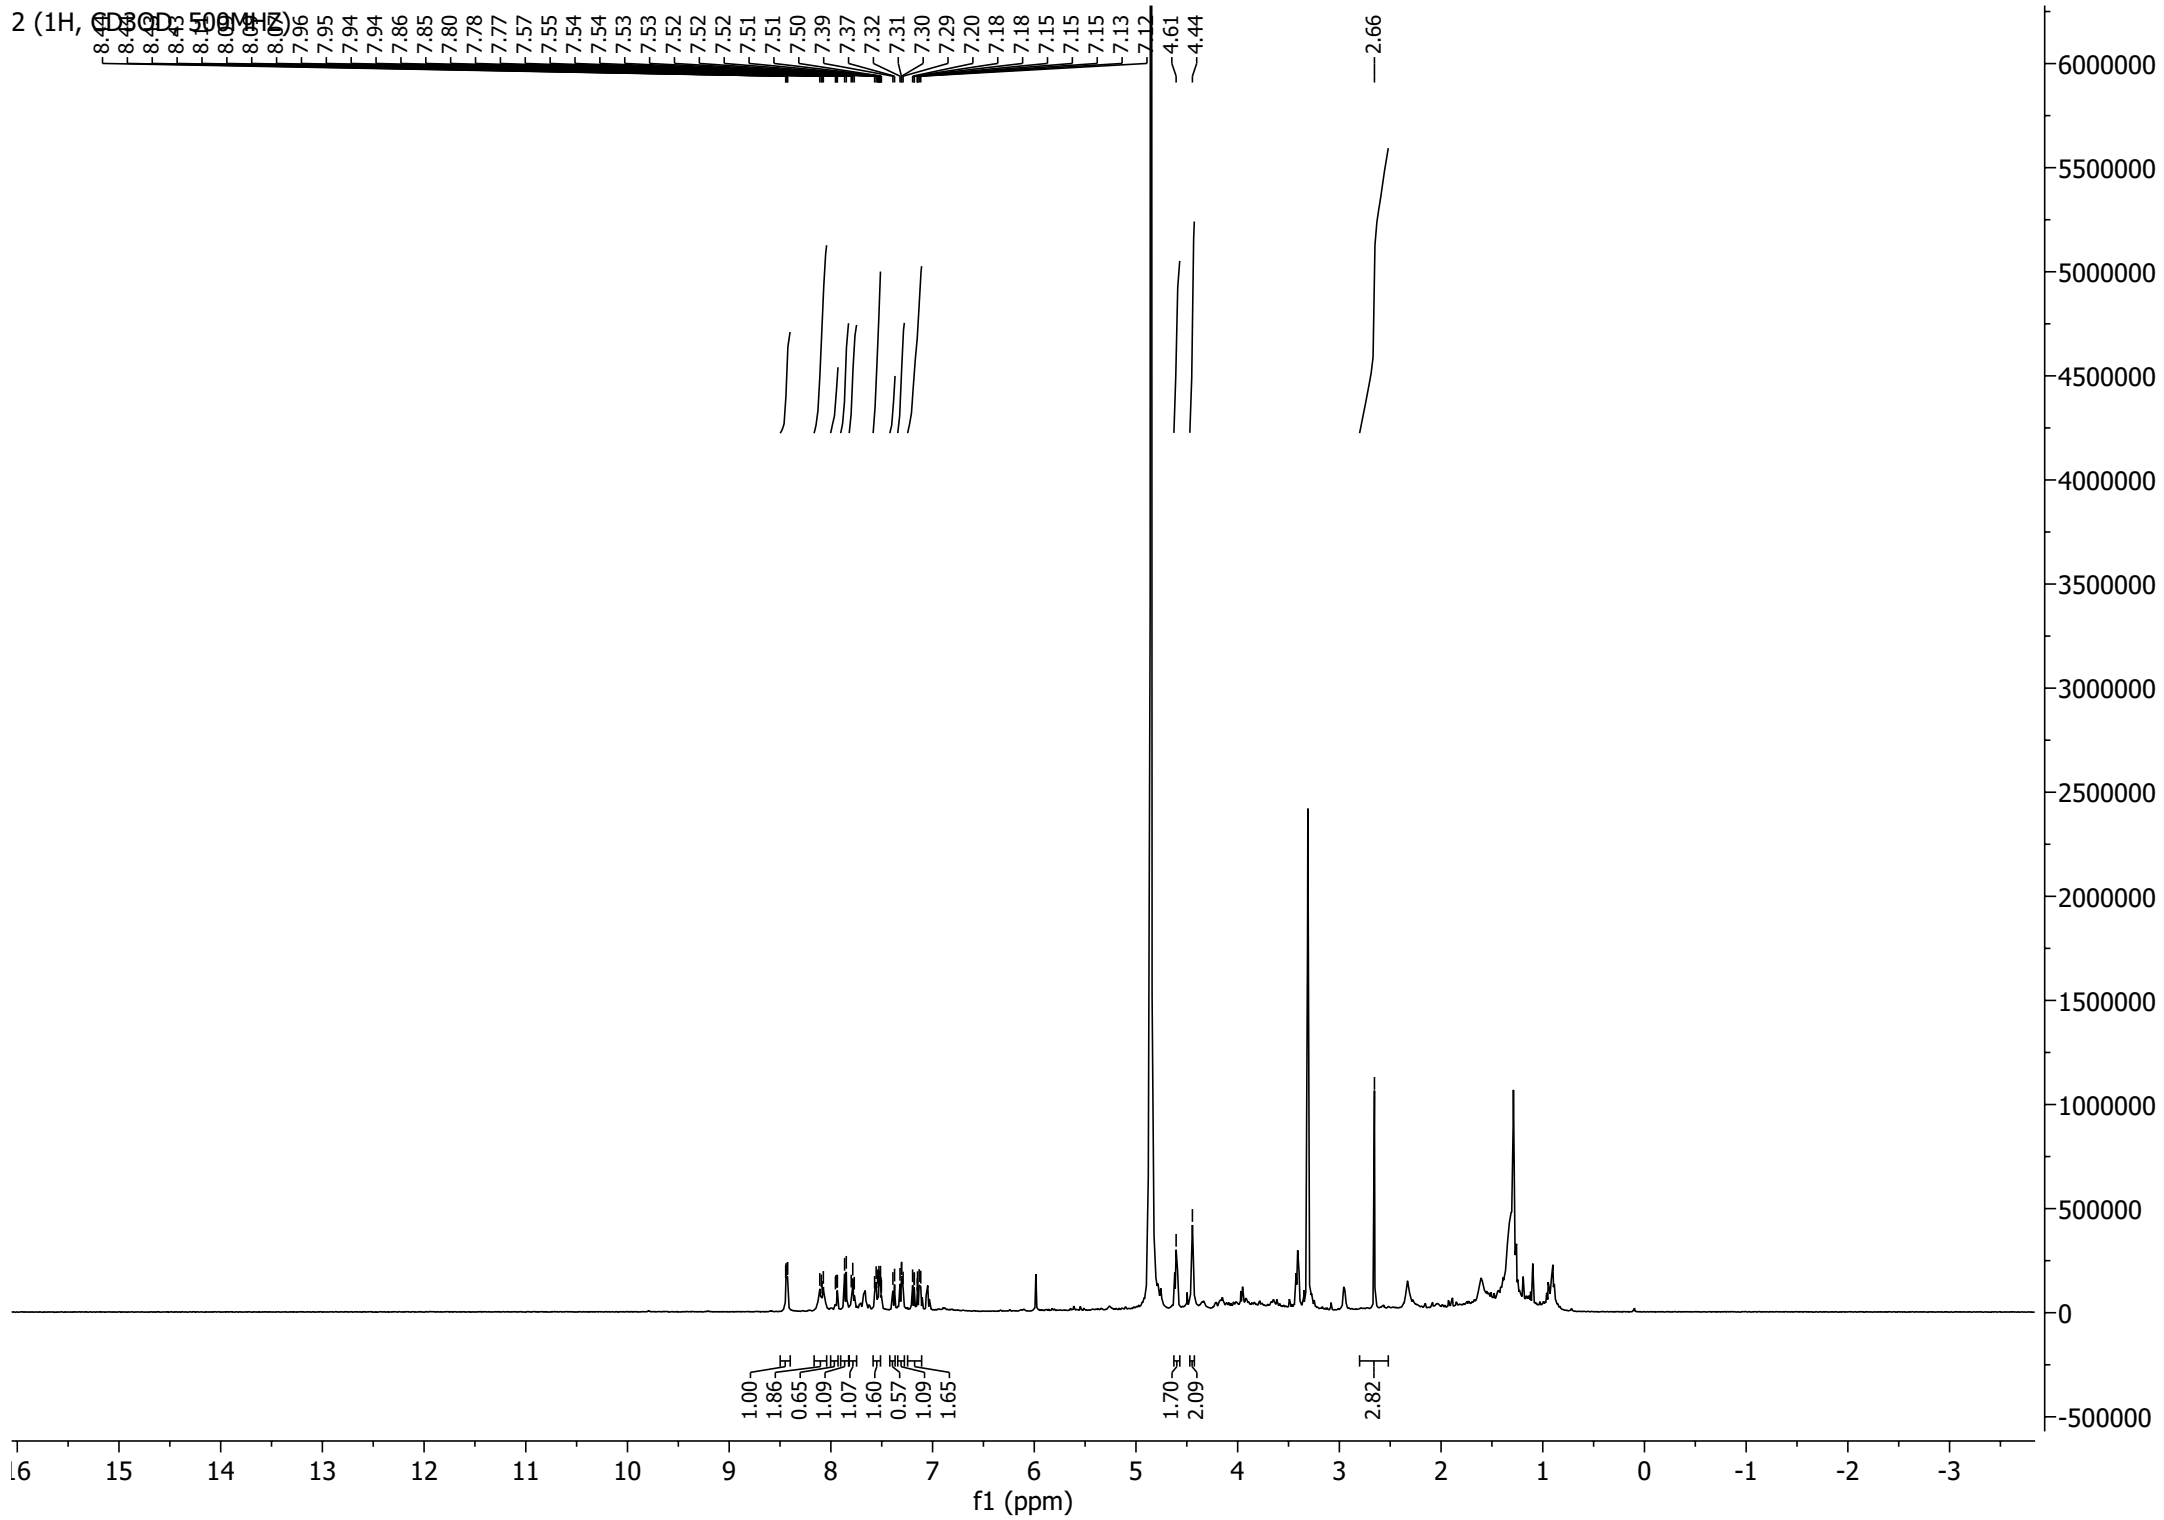

2(13C, CD3OD, 500MHz)

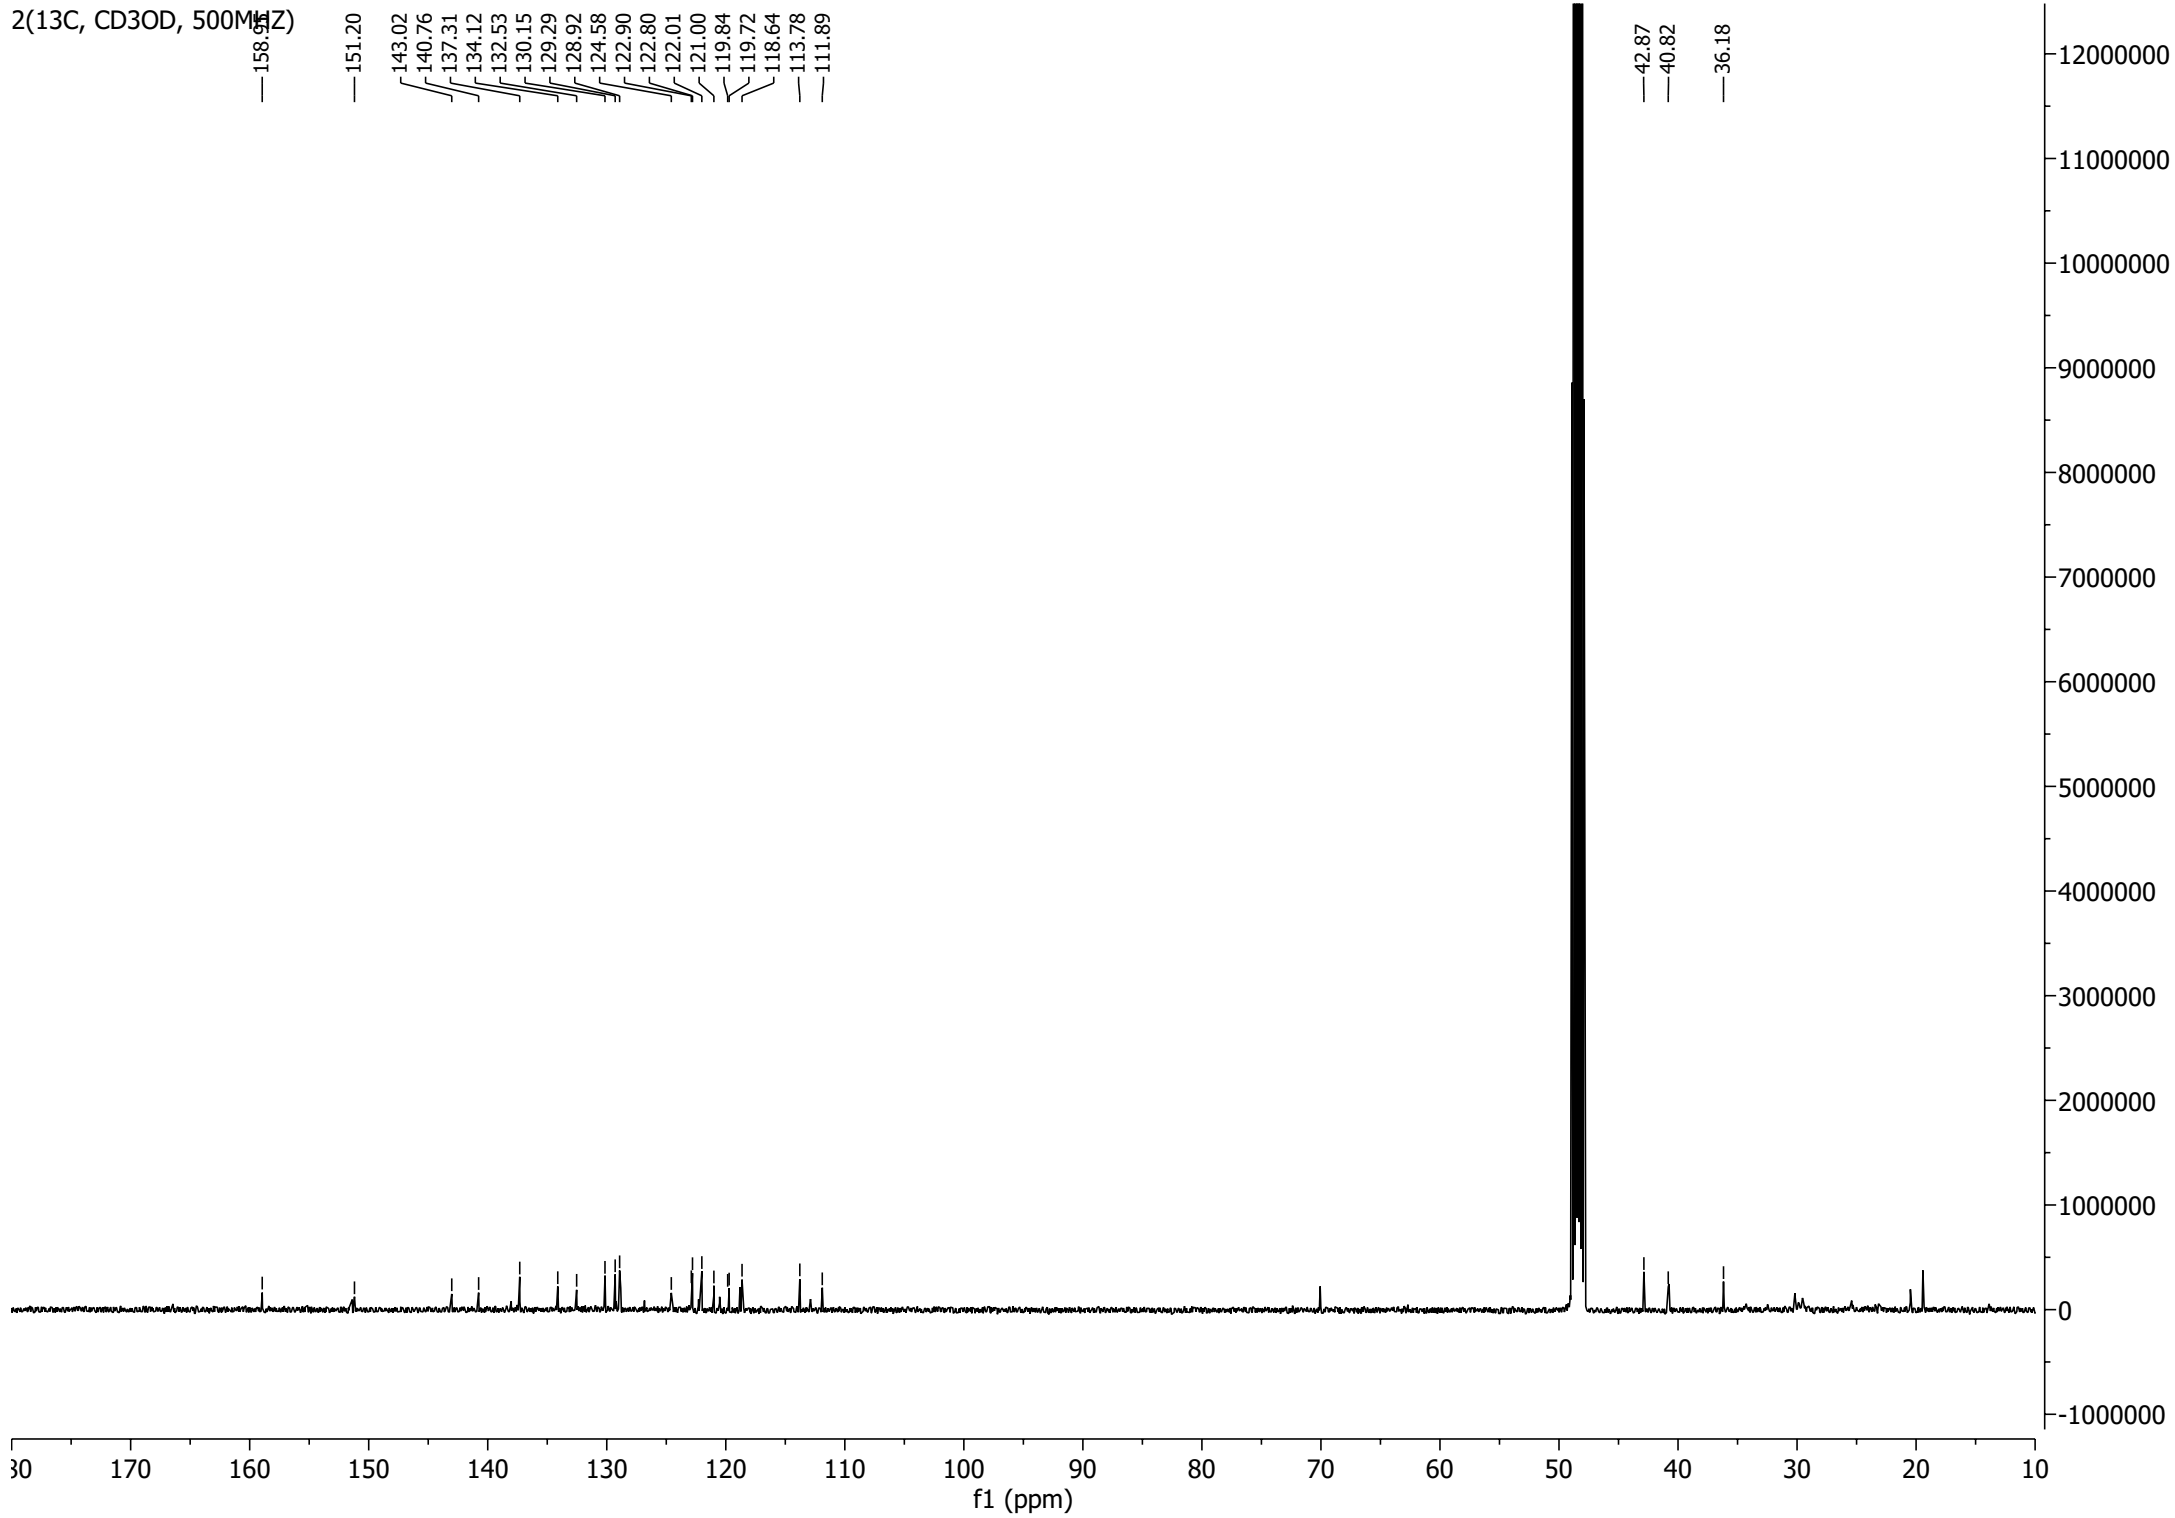

2 (DEPT-135, CD3OD, 500 MHz)

137.39  
134.11  
130.15  
129.30  
128.92  
122.80  
122.01  
121.00  
119.72  
118.64  
113.78  
111.90

42.87  
40.83  
36.18

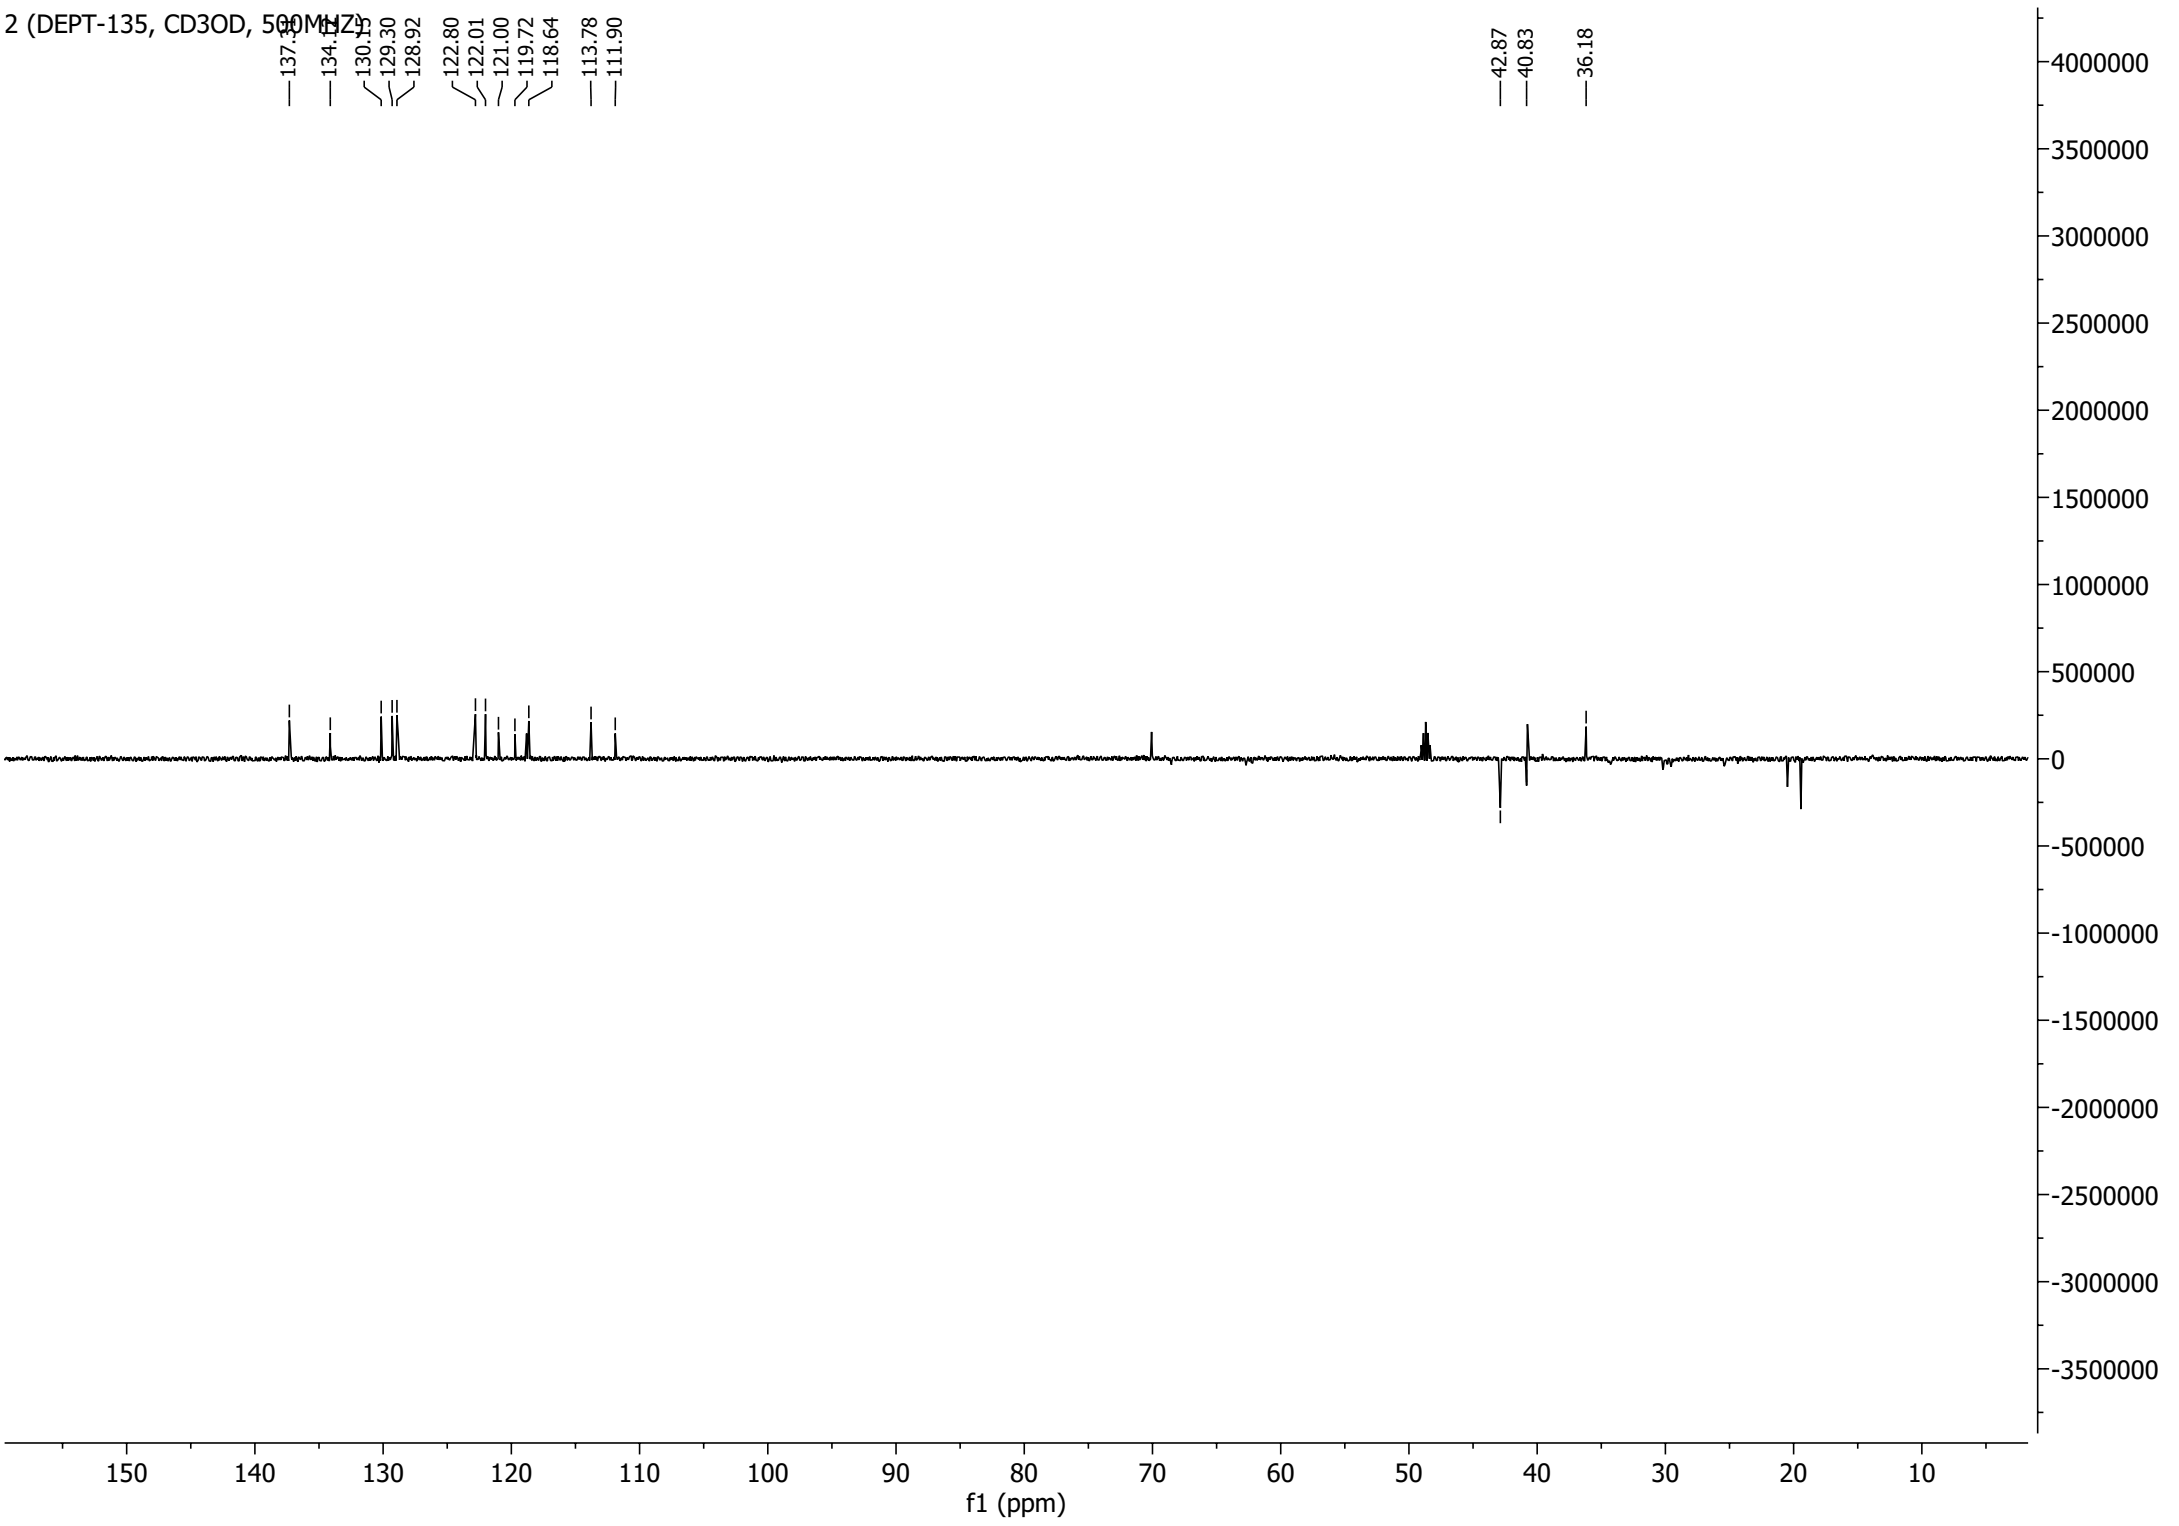

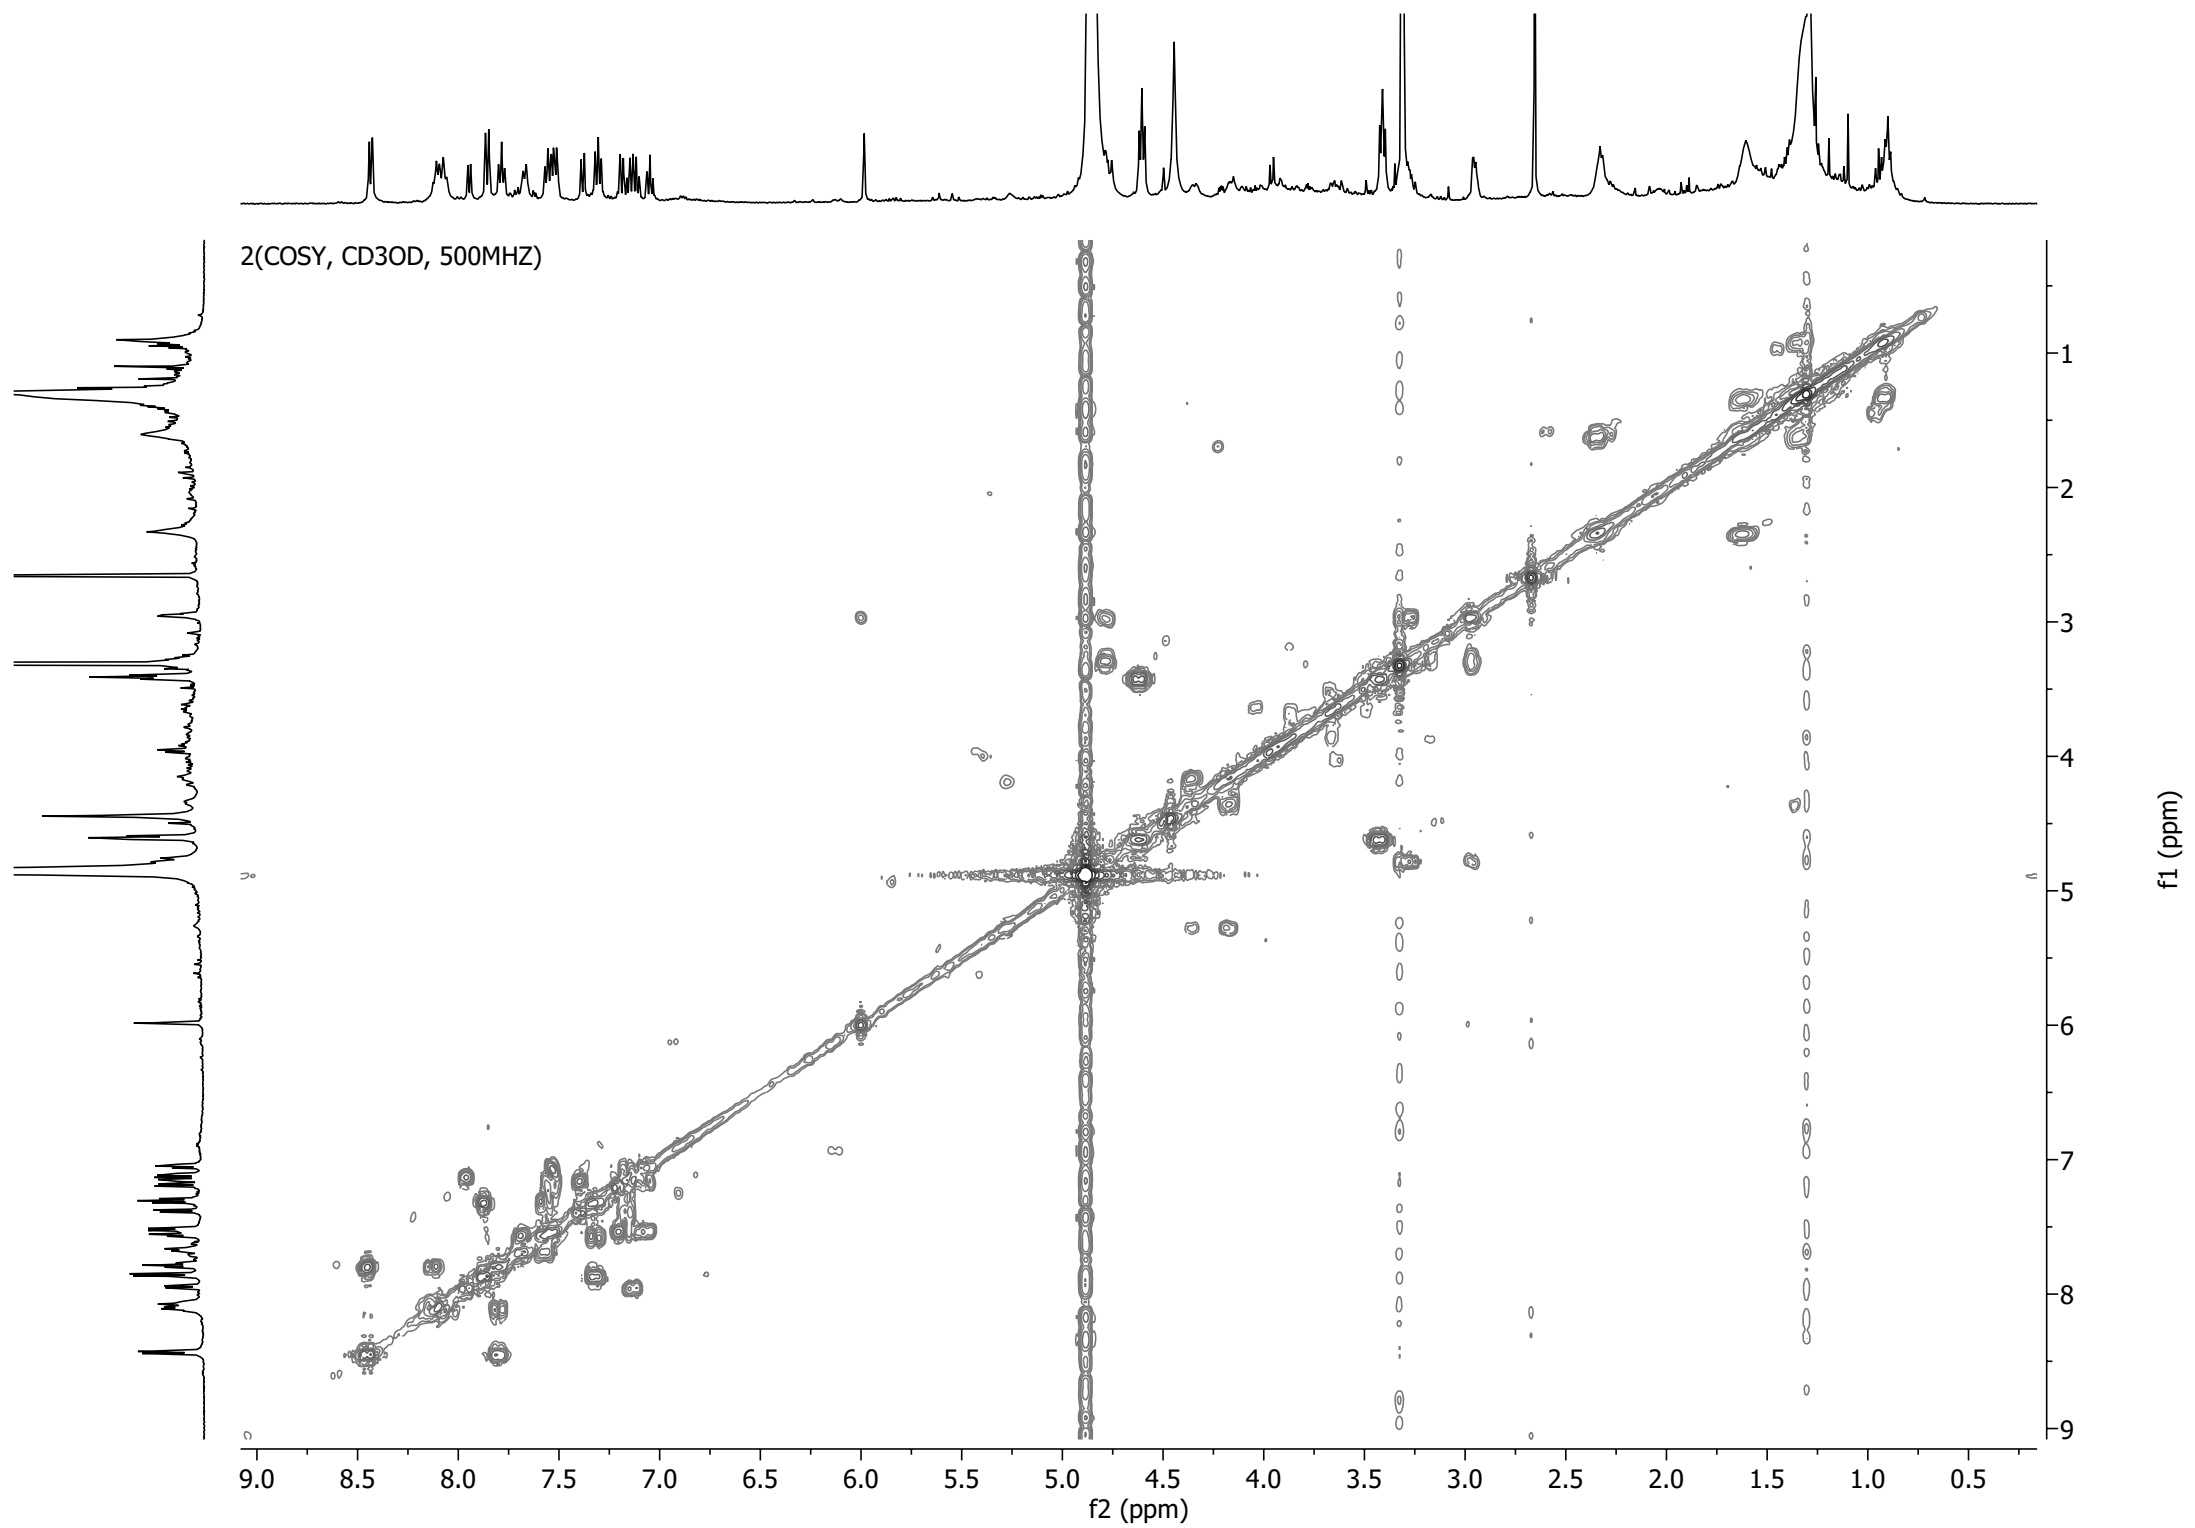

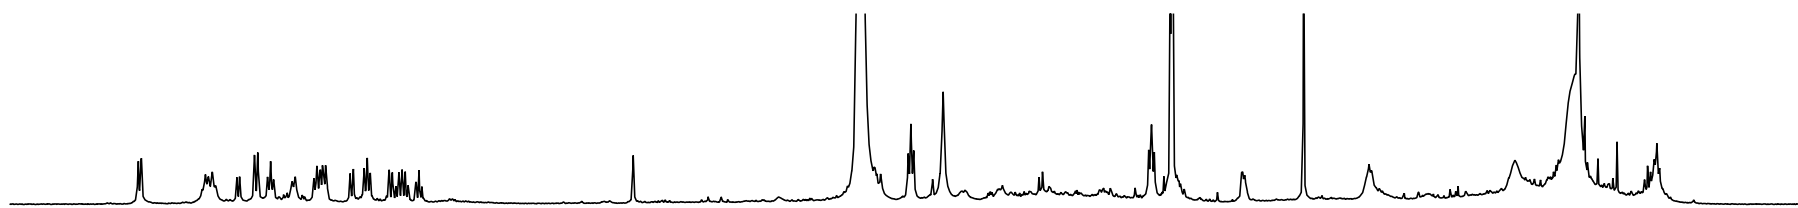

2 (HSQC, CD3OD, 500MHZ)

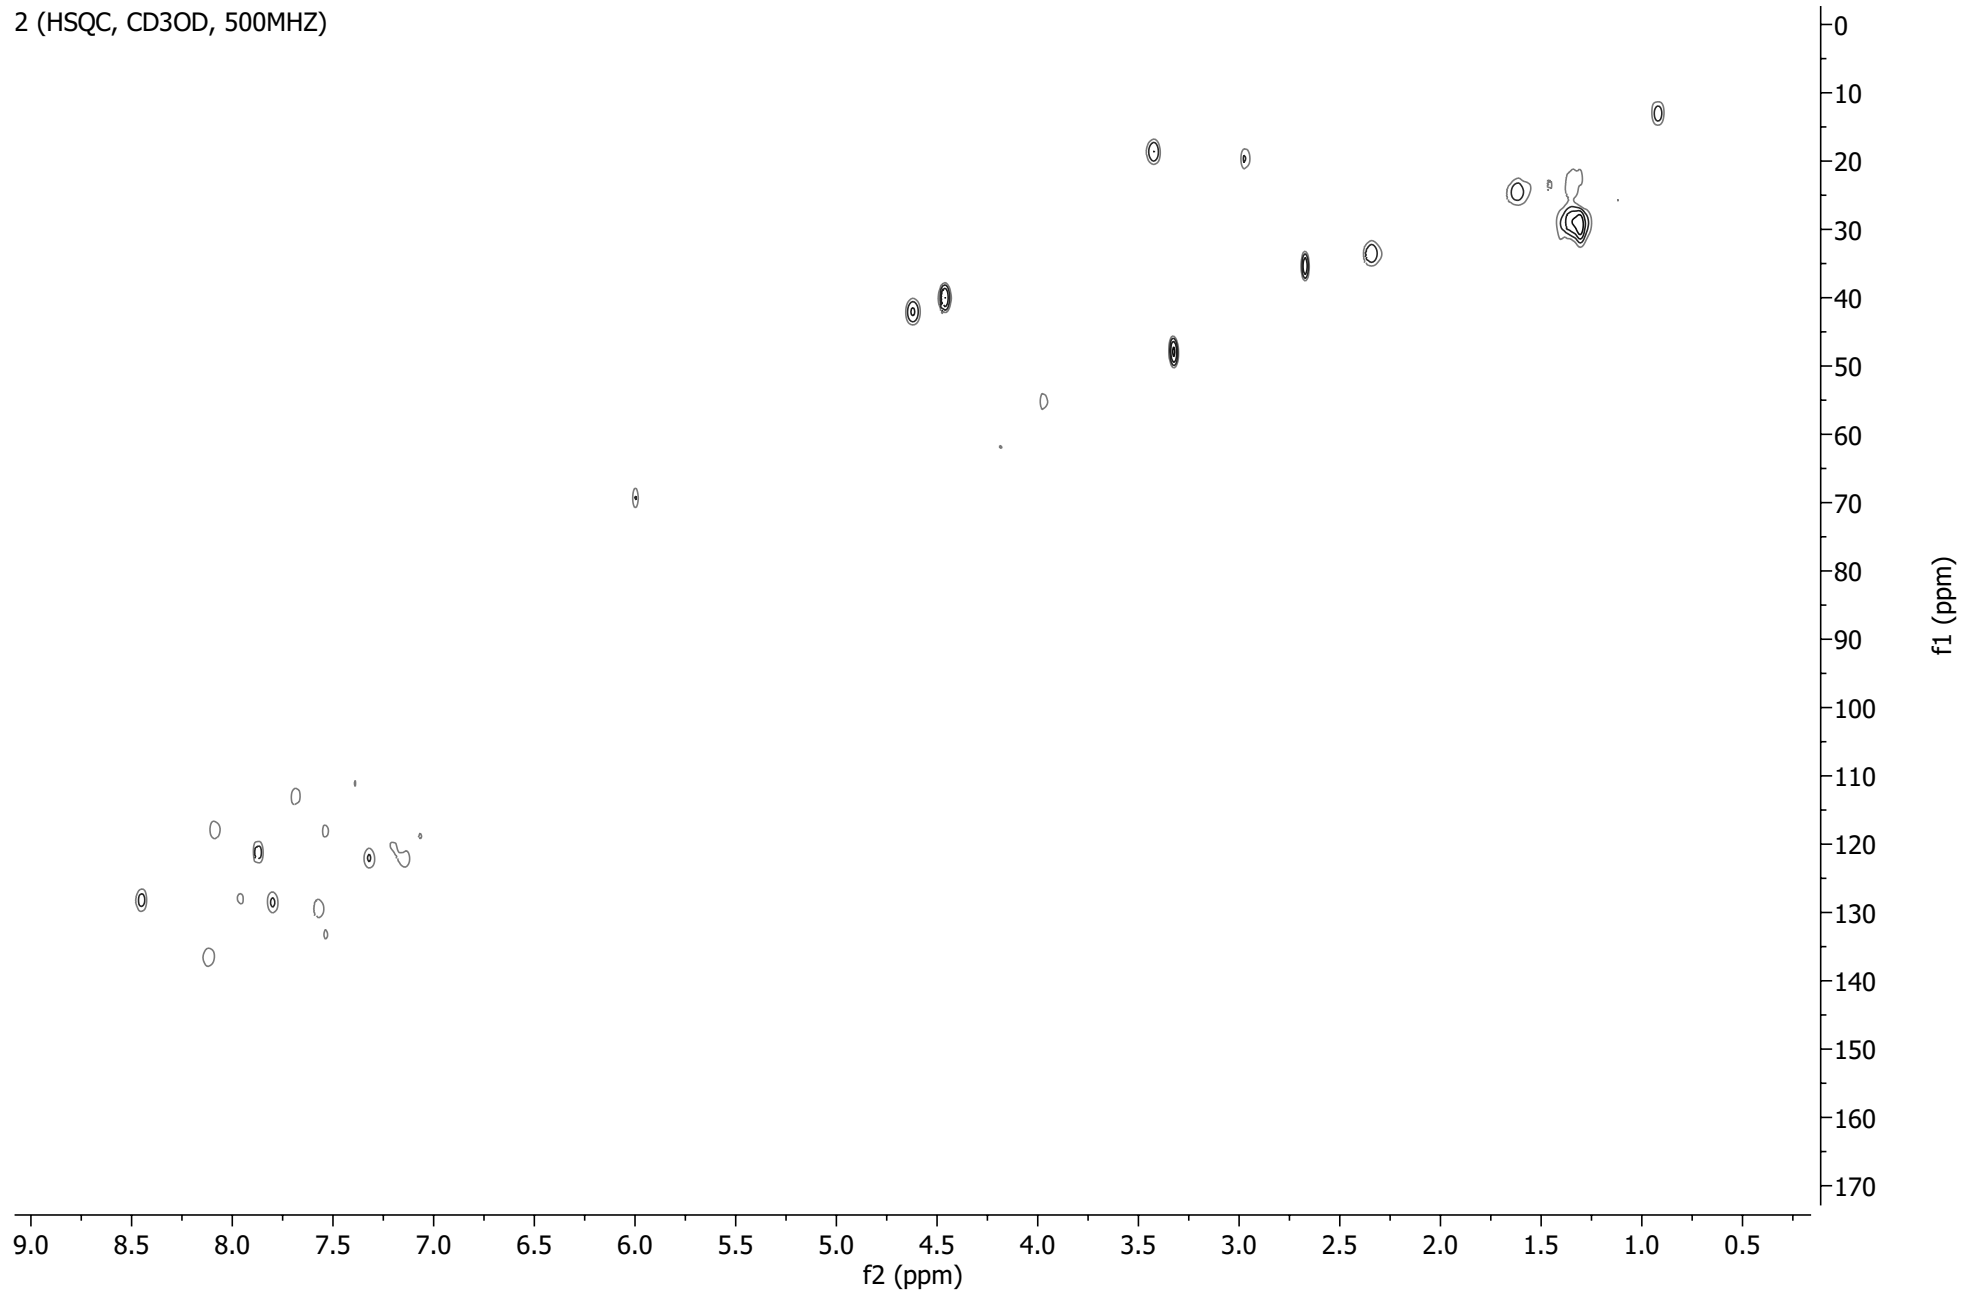

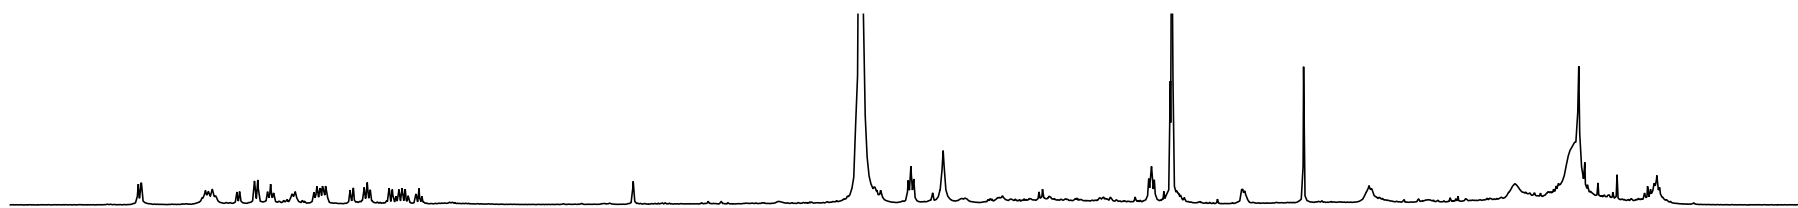

2 (HMBC, CD3OD, 500MHZ)

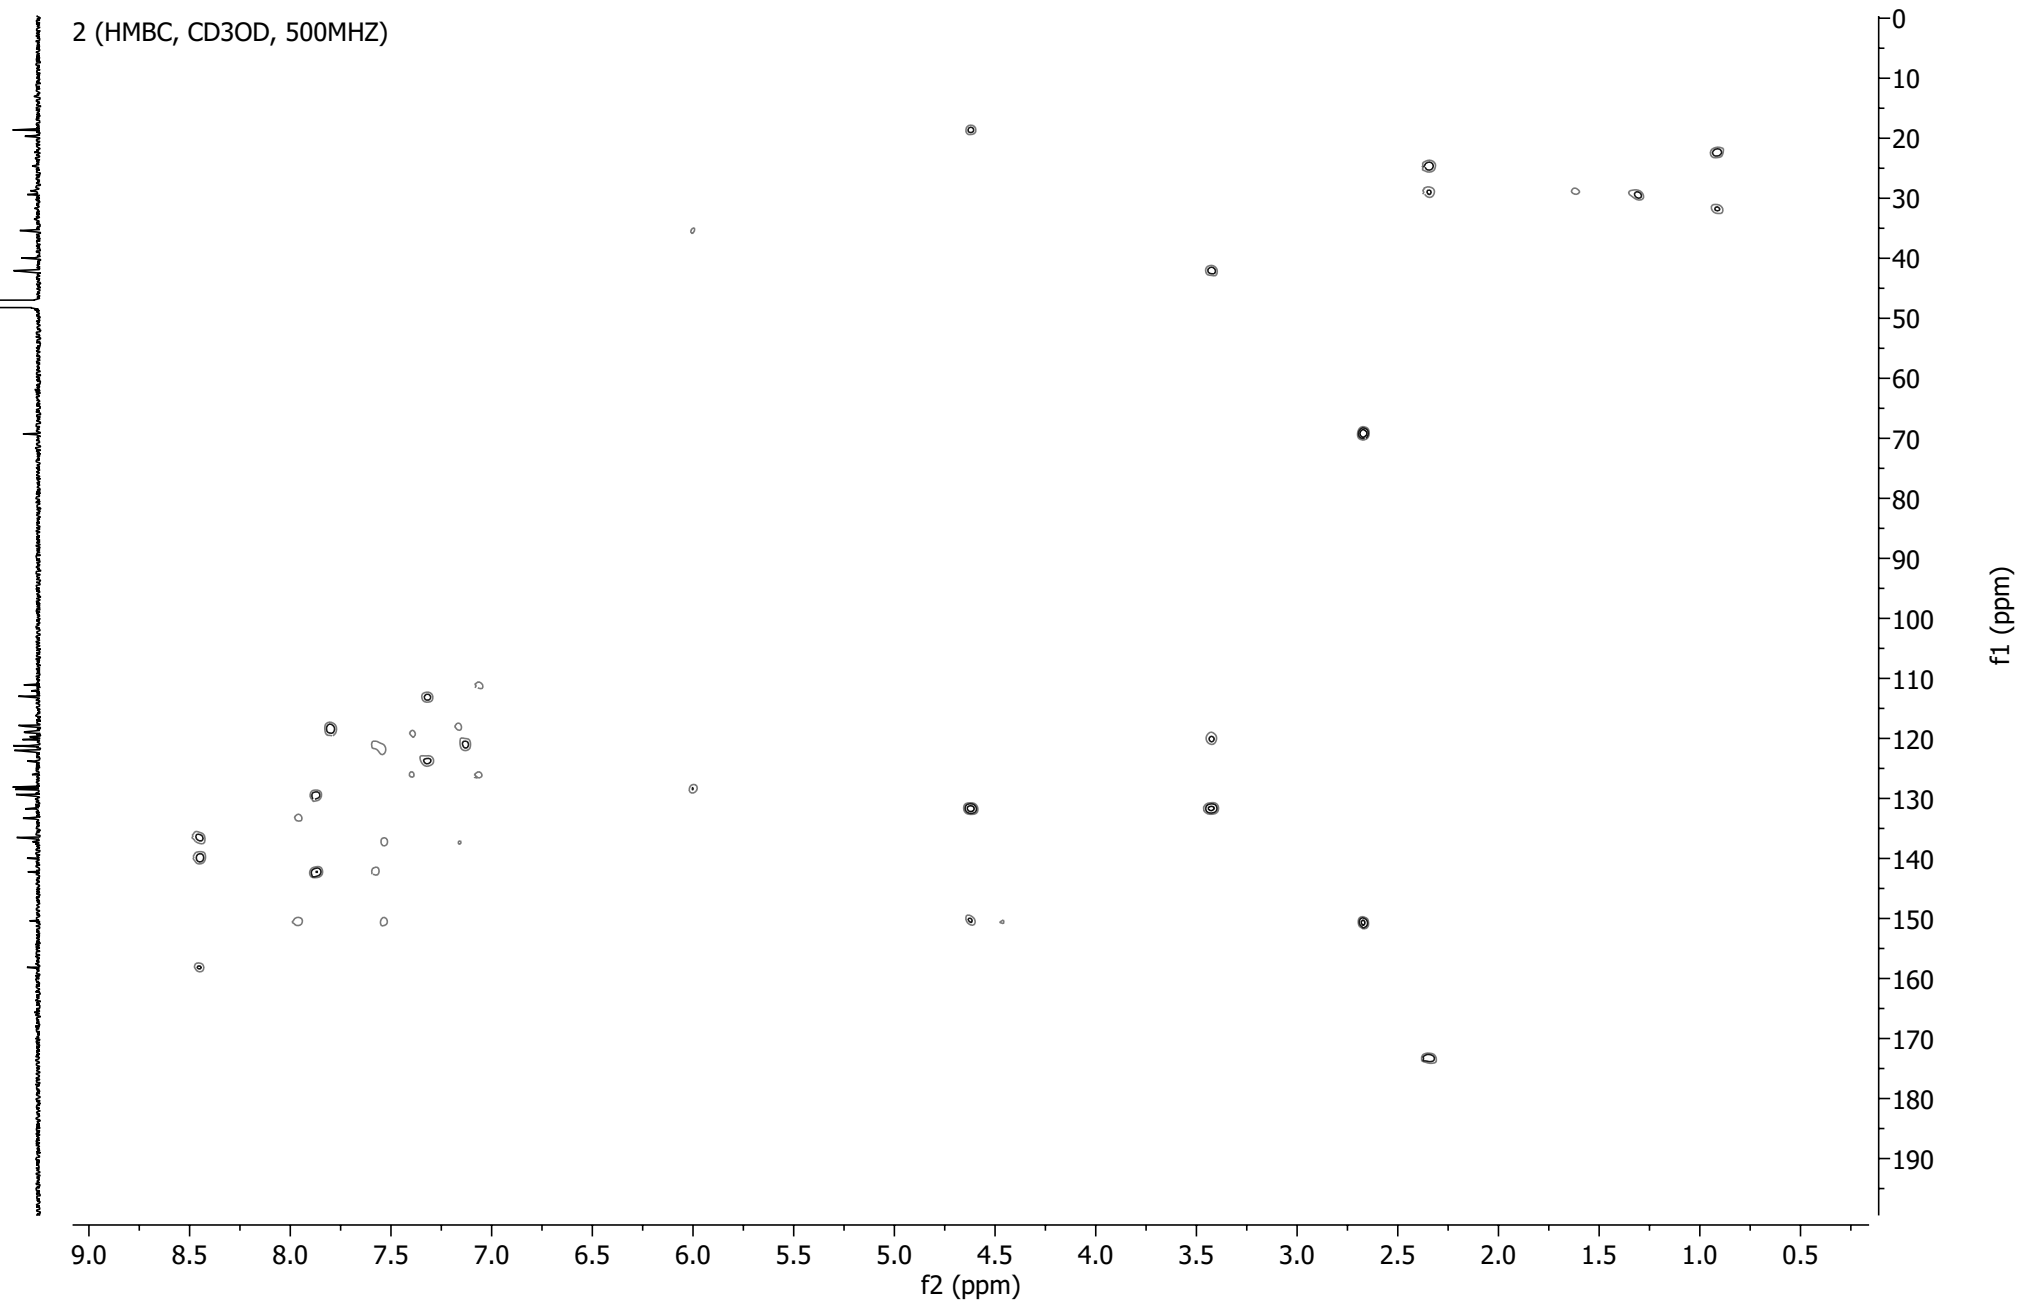

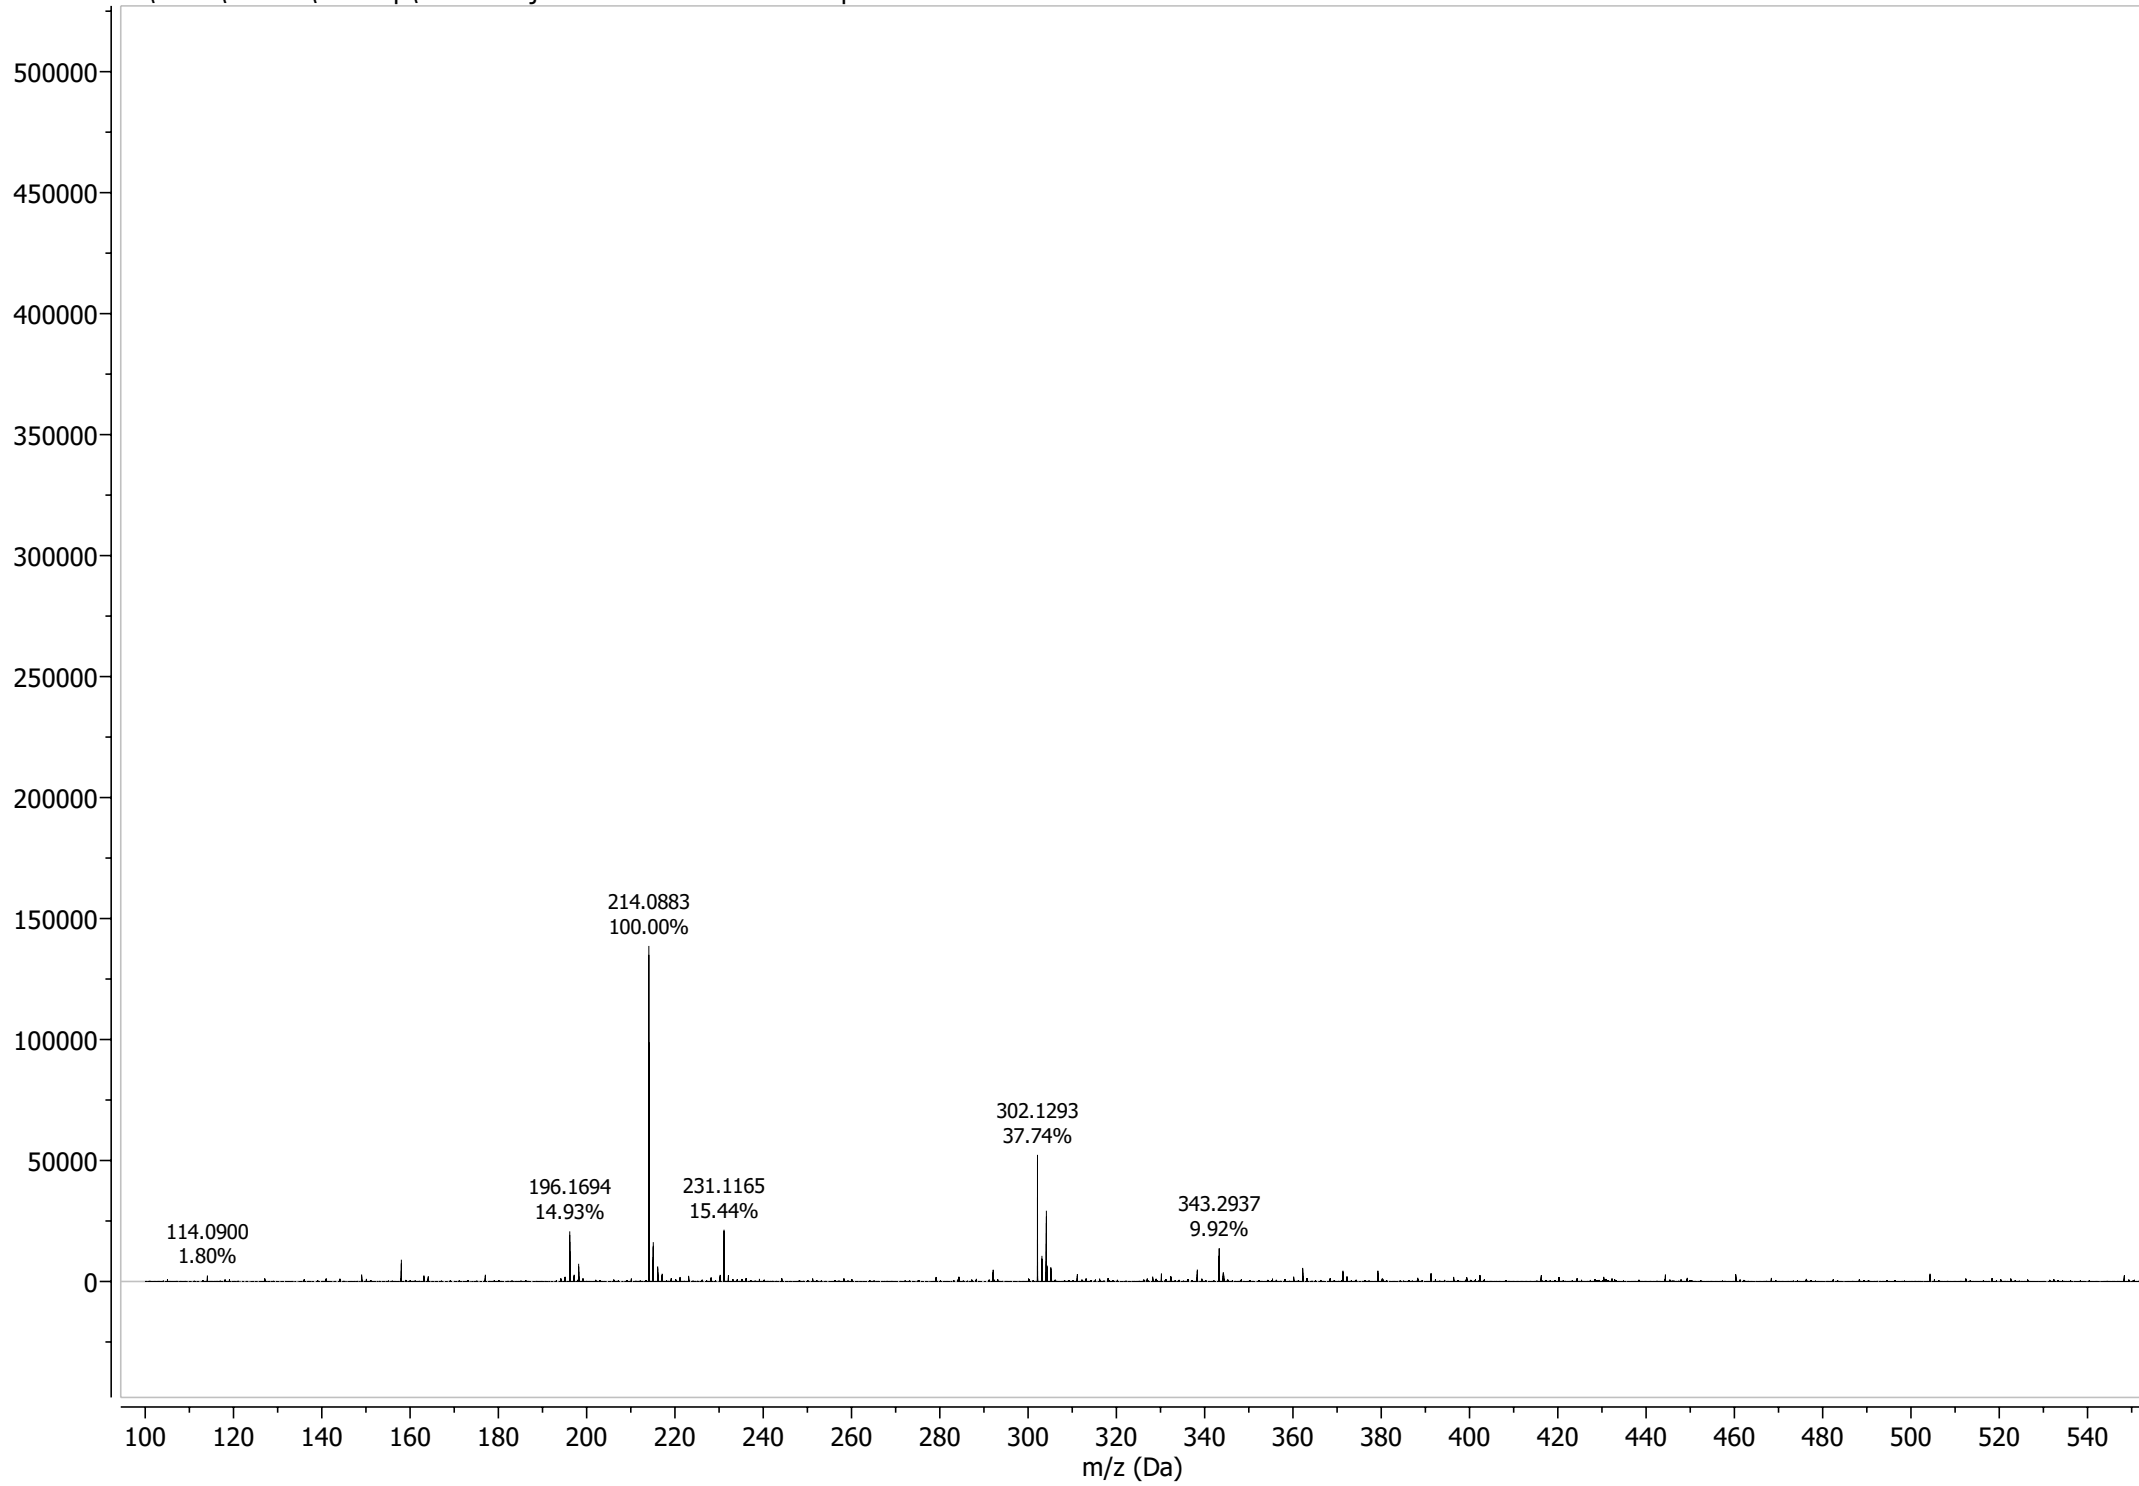

Supplement: Supplementary file 1 [file get_supplementary_file.php]
